# Supplementary material
Source: Elsevier journal article supplement (https://www.sciencedirect.com/science/article/pii/S185300281930028X)
Supplement: mmc1 [file S185300281930028X:mmc1.docx]

**ANEXO 1:**

HERRAMIENTA DE EVALUACIÓN Y TRATAMIENTO DE LA MARCHA

(GAIT ASSESSMENT AND INTERVENTION TOOL = G.A.I.T.)

Nombre:______________________Fecha:_____________Evaluador:______

Miembro evaluado: ____ APM/ortesis/asistencia: ______________

**Fases de apoyo y balanceo**

1. Posición del hombro

0= normal

1=anormal (marque todo lo que corresponda, descendido___, elevado___, retropulsión___, antero pulsión___

2. Flexión del codo

0= < 45° (normal= ~ 10°)

1= 45° - 90°

2= > 90°

3. Balanceo del brazo

0= normal

1= anormal - reducido o ausente

4. Alineación del tronco (estático)

0= postura erecta normal (ausencia de flexión, extensión o inclinación lateral)

1= tronco en flexión___ o extensión___

2= tronco en inclinación lateral hacia la derecha___ o izquierda___

3= tronco en flexión___ o extensión___ e inclinación lateral hacia la derecha___ o izquierda___

**Fase de apoyo**

5. Postura o movimiento del tronco (plano sagital, vista lateral)

0= normal (se mantiene la alineación estática)

1= el tronco se flexiona___ o extiende___ < 30°

2= el tronco se flexiona___ o extiende___ 30° o más.

6. Postura o movimiento del tronco (plano frontal, vista anteroposterior)

0= normal (se mantiene la alineación estática)

1= el tronco se inclina lateralmente a la derecha___ o izquierda___ < 30°

2= el tronco se inclina lateralmente a la derecha___ o izquierda___ 30° o más.

7. Transferencia de peso (desplazamiento lateral de la cabeza, tronco y pelvis) (plano frontal, vista anteroposterior)

0= normal (~ 25 mm de transferencia sobre el miembro de apoyo)

1= transferencia reducida

2= casi nada o nada de transferencia de peso

2= excesiva carga de peso

8. Posición de la pelvis (plano frontal, vista anteroposterior)

0= normal (sin signo de Trendelenberg)

1= leve caída de la pelvis en el lado contralateral

2= severa caída de la pelvis en el lado contralateral

9. Extensión de cadera (plano sagital, vista lateral)

0= normal (se mueve de 30° de flexión de cadera en el contacto inicial a neutral en el apoyo medio, luego a 20° de extensión en el apoyo terminal)

1= la cadera se extiende a neutral en el apoyo medio, pero falta la extensión durante el apoyo terminal

2= anormal durante todo el apoyo (la cadera se mantiene en flexión o marcada extensión)

10. Rotación de la cadera (plano frontal, vista anteroposterior)

0= normal (neutral)

1= anormal, rotación interna

1= anormal, rotación externa

11. Rodilla - fase de contacto inicial (plano sagital, vista lateral). Elegir A___ o B___

A. Flexión de rodilla

0= normal (rodilla neutra/no hiperextendida)

1= 5°-15° de flexión de rodilla

2= > 15° pero < 30° de flexión de rodilla

3= > 30° de flexión de rodilla

B. Extensión de rodilla

0= normal (rodilla neutra/no flexionada)

1= 5°-15° de hiperextensión

2= > 15° pero < 30° de hiperextensión de rodilla

3= > 30° de hiperextensión de rodilla

12. Rodilla - fase de respuesta a la carga (plano sagital, vista lateral). Elegir A___ o B___

A. Flexión de rodilla

0= normal (hasta 15° de flexión)

1= > 15° pero < 30° de flexión de rodilla

2= > 30° de flexión de rodilla

B. Extensión de rodilla

0= normal (hasta 15° de flexión)

1= sin flexión, hasta 15° de hiperextensión

2= > 15° de hiperextensión de rodilla

13. Rodilla - fase de apoyo medio (plano sagital, vista lateral). Elegir A___, B___, C___, o D___

A. Flexión de rodilla

0= normal (rodilla en 4° de flexión en el apoyo del talón, aumentando hasta 15° de flexión durante el 14% del ciclo de marcha)

1= 5°-15° de flexión durante el apoyo medio, no logra posición neutra

2= > 15° pero < 30° de flexión de rodilla

3= > 30° de flexión de rodilla

B. Extensión de rodilla

0= normal (rodilla en 4° de flexión en el apoyo del talón, aumentando hasta 15° de flexión durante el 14% del ciclo de marcha)

1= rodilla extendida durante la fase de apoyo medio, no hiperextendida

2= hasta 15° de hiperextensión durante la fase de apoyo medio

3= > 15° de hiperextensión durante la fase de apoyo medio

C. Flexión de rodilla hacia la extensión

0= normal (rodilla en 4° de flexión en el apoyo del talón, aumentando hasta 15° de flexión durante el 14% del ciclo de marcha)

1= flexión de rodilla durante la fase de apoyo medio temprana, luego la rodilla se extiende a neutral

2= flexión de rodilla durante la fase de apoyo medio temprana, luego la rodilla se mueve a extensión completa (neutral o más) sin control, pero no trabándose hacia atrás

3 =flexión de rodilla durante la fase de apoyo medio temprana, luego la rodilla se extiende de golpe o abruptamente hacia el rango final sin control

D. Extensión de rodilla hacia la flexión

0= normal (rodilla en 4° de flexión en el apoyo del talón, aumentando hasta 15° de flexión durante el 14% del ciclo de marcha)

1= la rodilla se mantiene en extensión durante la fase de apoyo medio temprana, luego se flexiona tarde, pero mantiene el control

2= la rodilla se mantiene en extensión durante la fase de apoyo medio temprana, luego se flexiona tarde pierde el control y lo recupera

3= la rodilla se mantiene en extensión durante la fase de apoyo medio temprana, luego se dobla y falla al recuperar el control, requiriendo el uso de estrategias compensatorias

14. Rodilla - fase de apoyo terminal/fase de pre balanceo (elevación del talón a despegue de los dedos) (plano sagital, vista lateral)

0= normal (posición de flexión de rodilla en plano sagital de 35° - 45°)

1= flexión de rodilla < 35° o > 45°

2= flexión de rodilla 35° - 45°, luego se extiende

3= rodilla en extensión completa durante toda la fase

15. Movimiento del tobillo (plano sagital, vista lateral). Elegir A___ o B___

A. Flexión plantar

0= normal (desde una posición neutral del tobillo en el contacto inicial del talón, a 10° de flexión plantar antes del apoyo medio, luego 10° de flexión dorsal en el despegue del talón)

1= normal desde el contacto inicial (apoyo del talón) hasta el apoyo medio, pero en flexión plantar luego del apoyo medio

1= pie plano en el contacto inicial, moviéndose hacia una leve flexión plantar antes del apoyo medio, pero en flexión plantar luego del apoyo medio

2= pie plano en el contacto inicial con flexión plantar en el despegue del talón

3= sin apoyo del talón con excesiva flexión plantar hasta el despegue del talón

3= apoyo o no apoyo del talón seguida de excesiva y/o temprana (apoyo medio) flexión plantar (abovedado)

B. Flexión dorsal

0= normal (desde una posición neutral del tobillo en el contacto inicial del talón, a 10° de flexión plantar antes del apoyo medio, luego 10° de flexión dorsal en el despegue del talón)

1= normal justo antes del apoyo medio, pero > 10°de dorsiflexión luego del apoyo medio

2= 15° - 20° de dorsiflexión en el apoyo medio y en el apoyo terminal (despegue del talón)

3= excesiva flexión dorsal (> 20°) durante todo el apoyo

16. Inversión del tobillo (plano frontal, vista anteroposterior)

0= normal (leve inversión/supinación en el apoyo inicial, luego eversión/pronación hasta el despegue del talón)

1= excesiva inversión/supinación presente en el contacto inicial

2= excesiva inversión/supinación presente en el contacto inicial y hasta el apoyo medio

3= excesiva inversión/supinación durante toda la fase

17. Flexión plantar durante el apoyo terminal/pre balanceo (elevación del talón a despegue de los dedos) (plano sagital, vista lateral)

0= normal (empuje adecuado en el pre balanceo para mover desde una posición de dorsiflexión a 10° de flexión plantar)

1= empuje parcial o débil moviendo a una flexión plantar en el despegue de los dedos

2= flexión plantar ausente, no empuje

18. Posición de los dedos (plano sagital, vista lateral)

0= normal (dedos en posición neutral)

1= excesiva extensión de los dedos

2= dedos en garra

**Fase de balanceo**

19. Postura/movimiento del tronco dinámico (plano sagital, vista lateral)

0= normal (se mantiene la alineación estática)

1= el tronco se flexiona___ o extiende___ < 30°

2= el tronco se flexiona___ o extiende___ 30° o más.

20. Postura/movimiento del tronco dinámico (plano frontal, vista anteroposterior)

0= normal (se mantiene la alineación estática)

1= el tronco se inclina lateralmente a la derecha___ o izquierda___ < 30°

2= el tronco se inclina lateralmente a la derecha___ o izquierda___ 30° o más.

21. Posición de la pelvis (plano frontal, vista anteroposterior)

0= normal (relativamente a nivel o apenas descendida en el lado del balanceo)

1= elevación leve de la cadera

2= elevación moderada o severa de la cadera

22. Posición de la pelvis (plano sagital, vista lateral)

0= normal (posición neutral con respecto a la inclinación anterior o posterior)

1= inclinación anterior de la pelvis

2= inclinación posterior de la pelvis

23. Rotación de la pelvis durante el balanceo del miembro hacia adelante (plano transversal, vista superior)

0= normal (de 5° de rotación hacia atrás en el inicio del balanceo a 5° de rotación hacia adelante en el balanceo terminal)

1= rotación pélvica reducida

1= rotación pélvica excesiva

2= rotación pélvica ausente

24. Flexión de cadera (plano sagital, vista lateral)

0= normal (0° de flexión en el balanceo inicial a 35° pico, luego reducción a 25° en el balanceo terminal; cadera neutral respecto a abducción/aducción)

1= flexión de la cadera en el balanceo, pero normal en el pico

1= > 10°, pero < 30° de flexión de cadera pico en el plano sagital

2= > 10°, pero < 30° de flexión de cadera pico y con abducción de cadera (circunducción)

2= > 10°, pero < 30° de flexión de cadera pico y con aducción (marcha en tijera)

3= 0 a 10° de flexión de cadera durante todo el balanceo

3= > 35° de flexión (excesiva flexión de cadera)

25. Rotación de cadera (plano frontal, vista anteroposterior)

0= normal (neutral)

1= anormal, rotación interna

1= anormal, rotación externa

26. Rodilla - balanceo inicial (plano sagital, vista lateral)

0= normal (40° - 60° de flexión)

1= al menos 15° de flexión, pero < 40°

2= < 15° de flexión

3= flexión ausente

27. Rodilla - balanceo medio (plano sagital, vista lateral)

0= normal (60° de flexión ± 4°)

1= 45° - 55° de flexión

2= 25° - 45° de flexión

3= 0 a 25° de flexión

28. Rodilla - balanceo terminal (plano sagital, vista lateral)

0= normal (desde la posición de rodilla flexionada a extensión completa)

1= desde la posición de rodilla flexionada, se mantiene en flexión durante toda la fase

1= desde la posición de rodilla extendida, se mantiene en extensión durante toda la fase

29. Movimiento del tobillo (plano sagital, vista lateral)

0= normal (desde una posición de flexión plantar en el apoyo terminal a neutral en el balanceo medio, luego leve dorsiflexión justo previo al contacto inicial del apoyo)

1= tobillo neutral en el balanceo medio, pero no flexión dorsal en el balanceo terminal

2= sin posición neutral en el balanceo medio y no dorsiflexión en el balanceo terminal; flexión plantar durante toda la fase.

30. Inversión del tobillo (plano frontal, vista anteroposterior)

0= normal (el tobillo se mantiene neutral respecto a inversión/eversión)

1= tobillo en posición invertida durante el balanceo

31. Posición de los dedos (plano sagital, vista lateral)

0= normal (dedos en posición neutral)

1= inadecuada extensión de los dedos

2= dedos en garra

PUNTAJE TOTAL: _____/62

COMENTARIOS:___________________
